# Supplementary material for: Lived experience research as a resource for recovery: a mixed methods study
Source: PubMed Central journal article supplement (PMC7507671; doi:10.1186/s12888-020-02861-0), 2020-09-21
Supplement: 12888_2020_2861_MOESM2_ESM.pdf [file 12888_2020_2861_MOESM2_ESM.pdf]

# Your experience with the lived-experience research resources

Please complete the survey below, to tell us how you experienced the lived-experience research resources.

Your answers to this survey are anonymous.

Which lived-experience research resources did you see throughout the study?

- Concepts of recovery (the podcast)  
 What helps recovery (the portraits)  
 Hope (the hope box)  
 Personal medicine (the webster pack booklet)  
 Looking after physical health (the card pack)  
 Meaningful activity (the magazine)

Think about the 'concepts of recovery' resource (the podcast).

How much time did you spend listening to the 'concepts of recovery' resource?

- No time  
 Less than 5 minutes  
 5-10 minutes  
 10-20 minutes  
 More than 20 minutes

How interesting did you find the resource?

- Not interesting  
 A bit interesting  
 Very interesting  
 Extremely interesting

How easy was it to understand?

- Very difficult  
 A bit difficult  
 Fairly easy  
 Very easy

How helpful did you find that resource?

- Not helpful       A bit helpful       Very helpful       Extremely helpful

Has the 'concepts of recovery' resource made a difference in your life?

|                                                          | A big improvement     | A small improvement   | No difference         | Worsened              | Not sure              |
|----------------------------------------------------------|-----------------------|-----------------------|-----------------------|-----------------------|-----------------------|
| Your feelings about yourself                             | <input type="radio"/> | <input type="radio"/> | <input type="radio"/> | <input type="radio"/> | <input type="radio"/> |
| Your perspective on your own experiences                 | <input type="radio"/> | <input type="radio"/> | <input type="radio"/> | <input type="radio"/> | <input type="radio"/> |
| Your beliefs about your future or recovery               | <input type="radio"/> | <input type="radio"/> | <input type="radio"/> | <input type="radio"/> | <input type="radio"/> |
| Your ability to care for yourself and your mental health | <input type="radio"/> | <input type="radio"/> | <input type="radio"/> | <input type="radio"/> | <input type="radio"/> |

|                                                           |                       |                       |                       |                       |                       |
|-----------------------------------------------------------|-----------------------|-----------------------|-----------------------|-----------------------|-----------------------|
| Your ability to deal with the mental health system        | <input type="radio"/> | <input type="radio"/> | <input type="radio"/> | <input type="radio"/> | <input type="radio"/> |
| Your ability to interact with mental health professionals | <input type="radio"/> | <input type="radio"/> | <input type="radio"/> | <input type="radio"/> | <input type="radio"/> |
| Your understanding of other people and their experiences  | <input type="radio"/> | <input type="radio"/> | <input type="radio"/> | <input type="radio"/> | <input type="radio"/> |
| Your understandings about mental illness                  | <input type="radio"/> | <input type="radio"/> | <input type="radio"/> | <input type="radio"/> | <input type="radio"/> |
| Another sort of difference                                | <input type="radio"/> | <input type="radio"/> | <input type="radio"/> | <input type="radio"/> | <input type="radio"/> |

Please describe this difference.

---

Would you recommend the resource to others?  Yes  
 No

Think about the 'what helps recovery' resource (the portraits).

How much time did you spend looking at the 'what helps recovery' resource?  No time  
 Less than 5 minutes  
 5-10 minutes  
 10-20 minutes  
 More than 20 minutes

How interesting did you find the resource?  Not interesting  
 A bit interesting  
 Very interesting  
 Extremely interesting

How easy was it to understand?  Very difficult  
 A bit difficult  
 Fairly easy  
 Very easy

|                                         | Not helpful           | A bit helpful         | Very helpful          | Extremely helpful     |
|-----------------------------------------|-----------------------|-----------------------|-----------------------|-----------------------|
| How helpful did you find that resource? | <input type="radio"/> | <input type="radio"/> | <input type="radio"/> | <input type="radio"/> |

Has the 'what helps recovery' resource made a difference in your life?

|                                                           | A big improvement     | A small improvement   | No difference         | Worsened              | Not sure              |
|-----------------------------------------------------------|-----------------------|-----------------------|-----------------------|-----------------------|-----------------------|
| Your feelings about yourself                              | <input type="radio"/> | <input type="radio"/> | <input type="radio"/> | <input type="radio"/> | <input type="radio"/> |
| Your perspective on your own experiences                  | <input type="radio"/> | <input type="radio"/> | <input type="radio"/> | <input type="radio"/> | <input type="radio"/> |
| Your beliefs about your future or recovery                | <input type="radio"/> | <input type="radio"/> | <input type="radio"/> | <input type="radio"/> | <input type="radio"/> |
| Your ability to care for yourself and your mental health  | <input type="radio"/> | <input type="radio"/> | <input type="radio"/> | <input type="radio"/> | <input type="radio"/> |
| Your ability to deal with the mental health system        | <input type="radio"/> | <input type="radio"/> | <input type="radio"/> | <input type="radio"/> | <input type="radio"/> |
| Your ability to interact with mental health professionals | <input type="radio"/> | <input type="radio"/> | <input type="radio"/> | <input type="radio"/> | <input type="radio"/> |
| Your understanding of other people and their experiences  | <input type="radio"/> | <input type="radio"/> | <input type="radio"/> | <input type="radio"/> | <input type="radio"/> |
| Your understandings about mental illness                  | <input type="radio"/> | <input type="radio"/> | <input type="radio"/> | <input type="radio"/> | <input type="radio"/> |
| Another sort of difference                                | <input type="radio"/> | <input type="radio"/> | <input type="radio"/> | <input type="radio"/> | <input type="radio"/> |

Please describe this difference.

---

Would you recommend the resource to others?

- Yes  
 No

Think about the 'hope' resource (the hope box).

How much time did you spend with the 'hope' resource?

- No time  
 Less than 5 minutes  
 5-10 minutes  
 10-20 minutes  
 More than 20 minutes

How interesting did you find the resource?

- Not interesting  
 A bit interesting  
 Very interesting  
 Extremely interesting

How easy was it to understand?

- Very difficult  
 A bit difficult  
 Fairly easy  
 Very easy

How helpful did you find that resource?

- |                       |                       |                       |                       |
|-----------------------|-----------------------|-----------------------|-----------------------|
| Not helpful           | A bit helpful         | Very helpful          | Extremely helpful     |
| <input type="radio"/> | <input type="radio"/> | <input type="radio"/> | <input type="radio"/> |

Has the 'hope' resource made a difference in your life?

|                                                           | A big improvement     | A small improvement   | No difference         | Worsened              | Not sure              |
|-----------------------------------------------------------|-----------------------|-----------------------|-----------------------|-----------------------|-----------------------|
| Your feelings about yourself                              | <input type="radio"/> | <input type="radio"/> | <input type="radio"/> | <input type="radio"/> | <input type="radio"/> |
| Your perspective on your own experiences                  | <input type="radio"/> | <input type="radio"/> | <input type="radio"/> | <input type="radio"/> | <input type="radio"/> |
| Your beliefs about your future or recovery                | <input type="radio"/> | <input type="radio"/> | <input type="radio"/> | <input type="radio"/> | <input type="radio"/> |
| Your ability to care for yourself and your mental health  | <input type="radio"/> | <input type="radio"/> | <input type="radio"/> | <input type="radio"/> | <input type="radio"/> |
| Your ability to deal with the mental health system        | <input type="radio"/> | <input type="radio"/> | <input type="radio"/> | <input type="radio"/> | <input type="radio"/> |
| Your ability to interact with mental health professionals | <input type="radio"/> | <input type="radio"/> | <input type="radio"/> | <input type="radio"/> | <input type="radio"/> |
| Your understanding of other people and their experiences  | <input type="radio"/> | <input type="radio"/> | <input type="radio"/> | <input type="radio"/> | <input type="radio"/> |
| Your understandings about mental illness                  | <input type="radio"/> | <input type="radio"/> | <input type="radio"/> | <input type="radio"/> | <input type="radio"/> |
| Another sort of difference                                | <input type="radio"/> | <input type="radio"/> | <input type="radio"/> | <input type="radio"/> | <input type="radio"/> |

Please describe this difference.

---

Would you recommend the resource to others?

- Yes  
 No

Think about the 'personal medicine' resource (the webster pack booklet).

How much time did you spend with the 'personal medicine' resource?

- No time  
 Less than 5 minutes  
 5-10 minutes  
 10-20 minutes  
 More than 20 minutes

How interesting did you find the resource?

- Not interesting  
 A bit interesting  
 Very interesting  
 Extremely interesting

How easy was it to understand?

- Very difficult  
 A bit difficult  
 Fairly easy  
 Very easy

How helpful did you find that resource?

- | Not helpful           | A bit helpful         | Very helpful          | Extremely helpful     |
|-----------------------|-----------------------|-----------------------|-----------------------|
| <input type="radio"/> | <input type="radio"/> | <input type="radio"/> | <input type="radio"/> |

Has the 'personal medicine' resource made a difference in your life?

|                                                           | A big improvement     | A small improvement   | No difference         | Worsened              | Not sure              |
|-----------------------------------------------------------|-----------------------|-----------------------|-----------------------|-----------------------|-----------------------|
| Your feelings about yourself                              | <input type="radio"/> | <input type="radio"/> | <input type="radio"/> | <input type="radio"/> | <input type="radio"/> |
| Your perspective on your own experiences                  | <input type="radio"/> | <input type="radio"/> | <input type="radio"/> | <input type="radio"/> | <input type="radio"/> |
| Your beliefs about your future or recovery                | <input type="radio"/> | <input type="radio"/> | <input type="radio"/> | <input type="radio"/> | <input type="radio"/> |
| Your ability to care for yourself and your mental health  | <input type="radio"/> | <input type="radio"/> | <input type="radio"/> | <input type="radio"/> | <input type="radio"/> |
| Your ability to deal with the mental health system        | <input type="radio"/> | <input type="radio"/> | <input type="radio"/> | <input type="radio"/> | <input type="radio"/> |
| Your ability to interact with mental health professionals | <input type="radio"/> | <input type="radio"/> | <input type="radio"/> | <input type="radio"/> | <input type="radio"/> |
| Your understanding of other people and their experiences  | <input type="radio"/> | <input type="radio"/> | <input type="radio"/> | <input type="radio"/> | <input type="radio"/> |
| Your understandings about mental illness                  | <input type="radio"/> | <input type="radio"/> | <input type="radio"/> | <input type="radio"/> | <input type="radio"/> |
| Another sort of difference                                | <input type="radio"/> | <input type="radio"/> | <input type="radio"/> | <input type="radio"/> | <input type="radio"/> |

Please describe this difference.

---

Would you recommend the resource to others?

- Yes  
 No

Think about the 'looking after physical health' resource (the card pack).

How much time did you spend with the 'looking after physical health' resource?

- No time  
 Less than 5 minutes  
 5-10 minutes  
 10-20 minutes  
 More than 20 minutes

How interesting did you find the resource?

- Not interesting  
 A bit interesting  
 Very interesting  
 Extremely interesting

How easy was it to understand?

- Very difficult  
 A bit difficult  
 Fairly easy  
 Very easy

How helpful did you find that resource?

- Not helpful      A bit helpful      Very helpful      Extremely helpful
- 

Has the 'looking after physical health' resource made a difference in your life?

|                                                           | A big improvement     | A small improvement   | No difference         | Worsened              | Not sure              |
|-----------------------------------------------------------|-----------------------|-----------------------|-----------------------|-----------------------|-----------------------|
| Your feelings about yourself                              | <input type="radio"/> | <input type="radio"/> | <input type="radio"/> | <input type="radio"/> | <input type="radio"/> |
| Your perspective on your own experiences                  | <input type="radio"/> | <input type="radio"/> | <input type="radio"/> | <input type="radio"/> | <input type="radio"/> |
| Your beliefs about your future or recovery                | <input type="radio"/> | <input type="radio"/> | <input type="radio"/> | <input type="radio"/> | <input type="radio"/> |
| Your ability to care for yourself and your mental health  | <input type="radio"/> | <input type="radio"/> | <input type="radio"/> | <input type="radio"/> | <input type="radio"/> |
| Your ability to deal with the mental health system        | <input type="radio"/> | <input type="radio"/> | <input type="radio"/> | <input type="radio"/> | <input type="radio"/> |
| Your ability to interact with mental health professionals | <input type="radio"/> | <input type="radio"/> | <input type="radio"/> | <input type="radio"/> | <input type="radio"/> |
| Your understanding of other people and their experiences  | <input type="radio"/> | <input type="radio"/> | <input type="radio"/> | <input type="radio"/> | <input type="radio"/> |
| Your understandings about mental illness                  | <input type="radio"/> | <input type="radio"/> | <input type="radio"/> | <input type="radio"/> | <input type="radio"/> |
| Another sort of difference                                | <input type="radio"/> | <input type="radio"/> | <input type="radio"/> | <input type="radio"/> | <input type="radio"/> |

Please describe this difference.

---

Would you recommend the resource to others?

- Yes  
 No

Think about the 'meaningful activity' resource (the magazine).

How much time did you spend with the 'meaningful activity' resource?

- No time  
 Less than 5 minutes  
 5-10 minutes  
 10-20 minutes  
 More than 20 minutes

How interesting did you find the resource?

- Not interesting  
 A bit interesting  
 Very interesting  
 Extremely interesting

How easy was it to understand?

- Very difficult  
 A bit difficult  
 Fairly easy  
 Very easy

How helpful did you find that resource?

- | Not helpful           | A bit helpful         | Very helpful          | Extremely helpful     |
|-----------------------|-----------------------|-----------------------|-----------------------|
| <input type="radio"/> | <input type="radio"/> | <input type="radio"/> | <input type="radio"/> |

Has the 'meaningful activity' resource made a difference in your life?

|                                                           | A big improvement     | A small improvement   | No difference         | Worsened              | Not sure              |
|-----------------------------------------------------------|-----------------------|-----------------------|-----------------------|-----------------------|-----------------------|
| Your feelings about yourself                              | <input type="radio"/> | <input type="radio"/> | <input type="radio"/> | <input type="radio"/> | <input type="radio"/> |
| Your perspective on your own experiences                  | <input type="radio"/> | <input type="radio"/> | <input type="radio"/> | <input type="radio"/> | <input type="radio"/> |
| Your beliefs about your future or recovery                | <input type="radio"/> | <input type="radio"/> | <input type="radio"/> | <input type="radio"/> | <input type="radio"/> |
| Your ability to care for yourself and your mental health  | <input type="radio"/> | <input type="radio"/> | <input type="radio"/> | <input type="radio"/> | <input type="radio"/> |
| Your ability to deal with the mental health system        | <input type="radio"/> | <input type="radio"/> | <input type="radio"/> | <input type="radio"/> | <input type="radio"/> |
| Your ability to interact with mental health professionals | <input type="radio"/> | <input type="radio"/> | <input type="radio"/> | <input type="radio"/> | <input type="radio"/> |
| Your understanding of other people and their experiences  | <input type="radio"/> | <input type="radio"/> | <input type="radio"/> | <input type="radio"/> | <input type="radio"/> |
| Your understandings about mental illness                  | <input type="radio"/> | <input type="radio"/> | <input type="radio"/> | <input type="radio"/> | <input type="radio"/> |
| Another sort of difference                                | <input type="radio"/> | <input type="radio"/> | <input type="radio"/> | <input type="radio"/> | <input type="radio"/> |

Please describe this difference.

---

Would you recommend the resource to others?

- Yes  
 No

And a couple of final questions about your experience as a whole.

Are you interested in accessing more lived-experience research in the future?

- No  
 Probably not  
 Maybe  
 Definitely

Have you shared your knowledge from lived-experience research with anyone else?

- Yes  
 No  
 Not sure

Overall, how would you describe your experience of participating in the study?

- Negative  
 Neutral  
 Quite positive  
 Very positive

Please tell us anything else that will help us to understand your experience or improve lived-experience resources in the future.

---
